RESEARCH ARTICLE

# Environmental Niche Modelling of Phlebotomine Sand Flies and Cutaneous Leishmaniasis Identifies *Lutzomyia intermedia* as the Main Vector Species in Southeastern Brazil

Viviane Coutinho Meneguzzi<sup>1\*</sup>, Claudiney Biral dos Santos<sup>2</sup>, Gustavo Rocha Leite<sup>1</sup>, Blima Fux<sup>1#a</sup>, Aloísio Falqueto<sup>3#b</sup>

**1** Tropical Medicine Unit, Department of Pathology, Federal University of Espírito Santo (Universidade Federal do Espírito Santo), Vitória, ES, Brazil, **2** Nucleus of Entomology and Malacology (Núcleo de Entomologia e Malacologia) of the Espírito Santo State Health Secretariat, Serra, ES, Brazil, **3** Tropical Medicine Unit, Department of Social Medicine, Federal University of Espírito Santo (Universidade Federal do Espírito Santo), Vitória, ES, Brazil

<sup>#a</sup> Current address: Departamento de Patologia, Universidade Federal do Espírito Santo, Vitória, ES, Brasil  
<sup>#b</sup> Current address: Departamento de Medicina Tropical, Universidade Federal do Espírito Santo, Vitória, ES, Brasil

\* [vmeneguzzi@gmail.com](mailto:vmeneguzzi@gmail.com)

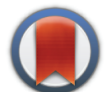

CrossMark  
click for updates

OPEN ACCESS

**Citation:** Meneguzzi VC, Santos CBd, Leite GR, Fux B, Falqueto A (2016) Environmental Niche Modelling of Phlebotomine Sand Flies and Cutaneous Leishmaniasis Identifies *Lutzomyia intermedia* as the Main Vector Species in Southeastern Brazil. PLoS ONE 11(10): e0164580. doi:10.1371/journal.pone.0164580

**Editor:** Michelle Louise Gatton, Queensland University of Technology, AUSTRALIA

**Received:** March 21, 2016

**Accepted:** September 27, 2016

**Published:** October 26, 2016

**Copyright:** © 2016 Meneguzzi et al. This is an open access article distributed under the terms of the [Creative Commons Attribution License](https://creativecommons.org/licenses/by/4.0/), which permits unrestricted use, distribution, and reproduction in any medium, provided the original author and source are credited.

**Data Availability Statement:** All relevant data are within the paper and its Supporting Information files.

**Funding:** This work was supported by Coordenação de Aperfeiçoamento de Pessoal de Nível Superior-CAPES, <http://www.capes.gov.br>, grant number 32/2010 (AF). The funder had no role in study design, data collection and analysis, decision to publish, or preparation of the manuscript.

## Abstract

Cutaneous leishmaniasis (CL) is caused by a protozoan of the genus *Leishmania* and is transmitted by sand flies. The state of Espírito Santo (ES), an endemic area in southeast Brazil, has shown a considerably high prevalence in recent decades. Environmental niche modelling (ENM) is a useful tool for predicting potential disease risk. In this study, ENM was applied to sand fly species and CL cases in ES to identify the principal vector and risk areas of the disease. Sand flies were collected in 466 rural localities between 1997 and 2013 using active and passive capture. Insects were identified to the species level, and the localities were georeferenced. Twenty-one bioclimatic variables were selected from WorldClim. Maxent was used to construct models projecting the potential distribution for five *Lutzomyia* species and CL cases. ENMTools was used to overlap the species and the CL case models. The Kruskal–Wallis test was performed, adopting a 5% significance level. Approximately 250,000 specimens were captured, belonging to 43 species. The area under the curve (AUC) was considered acceptable for all models. The slope was considered relevant to the construction of the models for all the species identified. The overlay test identified *Lutzomyia intermedia* as the main vector of CL in southeast Brazil. ENM tools enable an analysis of the association among environmental variables, vector distributions and CL cases, which can be used to support epidemiologic and entomological vigilance actions to control the expansion of CL in vulnerable areas.

**Competing Interests:** The authors have declared that no competing interests exist.

## Introduction

Cutaneous leishmaniasis (CL) is a disease caused by protozoans of the genus *Leishmania* Ross, 1903 and is transmitted by insects from the subfamily Phlebotominae [1–2]. Decades ago, CL was exclusively presented as an enzootic disease of wild animals that occasionally affected humans in forest habitats. The disease has been considered an emerging infectious disease, and an increased prevalence has been observed, which is associated with deforestation, exploitation of natural resources, agricultural expansion, and migration of populations [3].

Currently, the disease occurs in deforested rural and peri-urban areas in Brazil [4–6]. In these regions, both adults and children are living with the disease, and domestic dogs have been suggested to be an important source of infection [7–9].

CL is well distributed throughout Brazil, including the state of Espírito Santo (ES), located in the southeast, where it is widely distributed and affects predominantly rural populations [10–12]. Until the mid-1980s, the disease was predominant in western ES, where the geo-climatic conditions presumably favoured the development of both the vector and the wild reservoirs of the disease, which are grouped mainly in the Rodentia order (e.g., *Akodon* sp.) [12,13]. After the mid-1980s, however, changes in the economic structure of the state caused changes in the population density profile, which allowed the geographic expansion of CL towards the eastern ES, most likely associated with domestic reservoirs such as dogs and horses [12–14]. In these areas, the increased population density in the periphery of urban centres favoured the displacement of domestic reservoirs through houses, increasing the incidence of CL [8,10].

Approximately 800 species of phlebotomine sand flies have been described worldwide, and approximately 60% of them occur in the Neotropics [1–2]. In Brazil, more than 260 species of phlebotomine sand flies have been recorded. They are distributed in all geographical regions [15], but the majority of them occur in the Amazon basin and in northeast Brazil.

In ES, approximately 59 species of sand flies have been recorded, among which, three species likely have epidemiological importance in disease transmission: *Lutzomyia intermedia* (Lutz & Neiva, 1912), *Lutzomyia migonei* (França, 1920), and *Lutzomyia whitmani* (Antunes & Coutinho, 1939) [16,17–20]. Other common species, such as *Lutzomyia choti* (Floch and Abonnenc, 1941) and *Lutzomyia lenti* (Mangabeira, 1938), seem to not be associated with the disease occurrence in ES [5]. However, no consistent investigation has been conducted on the role of these species in the disease transmission, its animal reservoirs, and the interactions between vector species and environmental conditions [21].

The use of the environmental approach offered by landscape epidemiology allows us to investigate the environmental aspects associated with the disease [22]. Recently, sophisticated techniques, such as environmental niche modelling (ENM), have been used to better understand the potential distribution of the species involved in the disease transmission, as well as to predict areas of potential risk.

Accordingly, the present study aimed to use spatial modelling techniques to identify vector species and their potential distribution and relationship with the occurrence of CL in ES, south-eastern Brazil.

## Materials and Methods

### Study area

The state of ES is located on the Atlantic coast of southeastern Brazil, between longitudes 17° 53'29"S 21°18'03"S and latitudes 39°41'18"W 41°52'45"W, with a geographical area of 46,096 km<sup>2</sup> and different ecologic characteristics, according to geo-climatic zones (Fig 1) [23].

The annual average temperature of this area is 23°C, and the annual rainfall is above 1,400 mm. The elevation in some regions can reach 2,800 m above sea level [24]. This state forms the

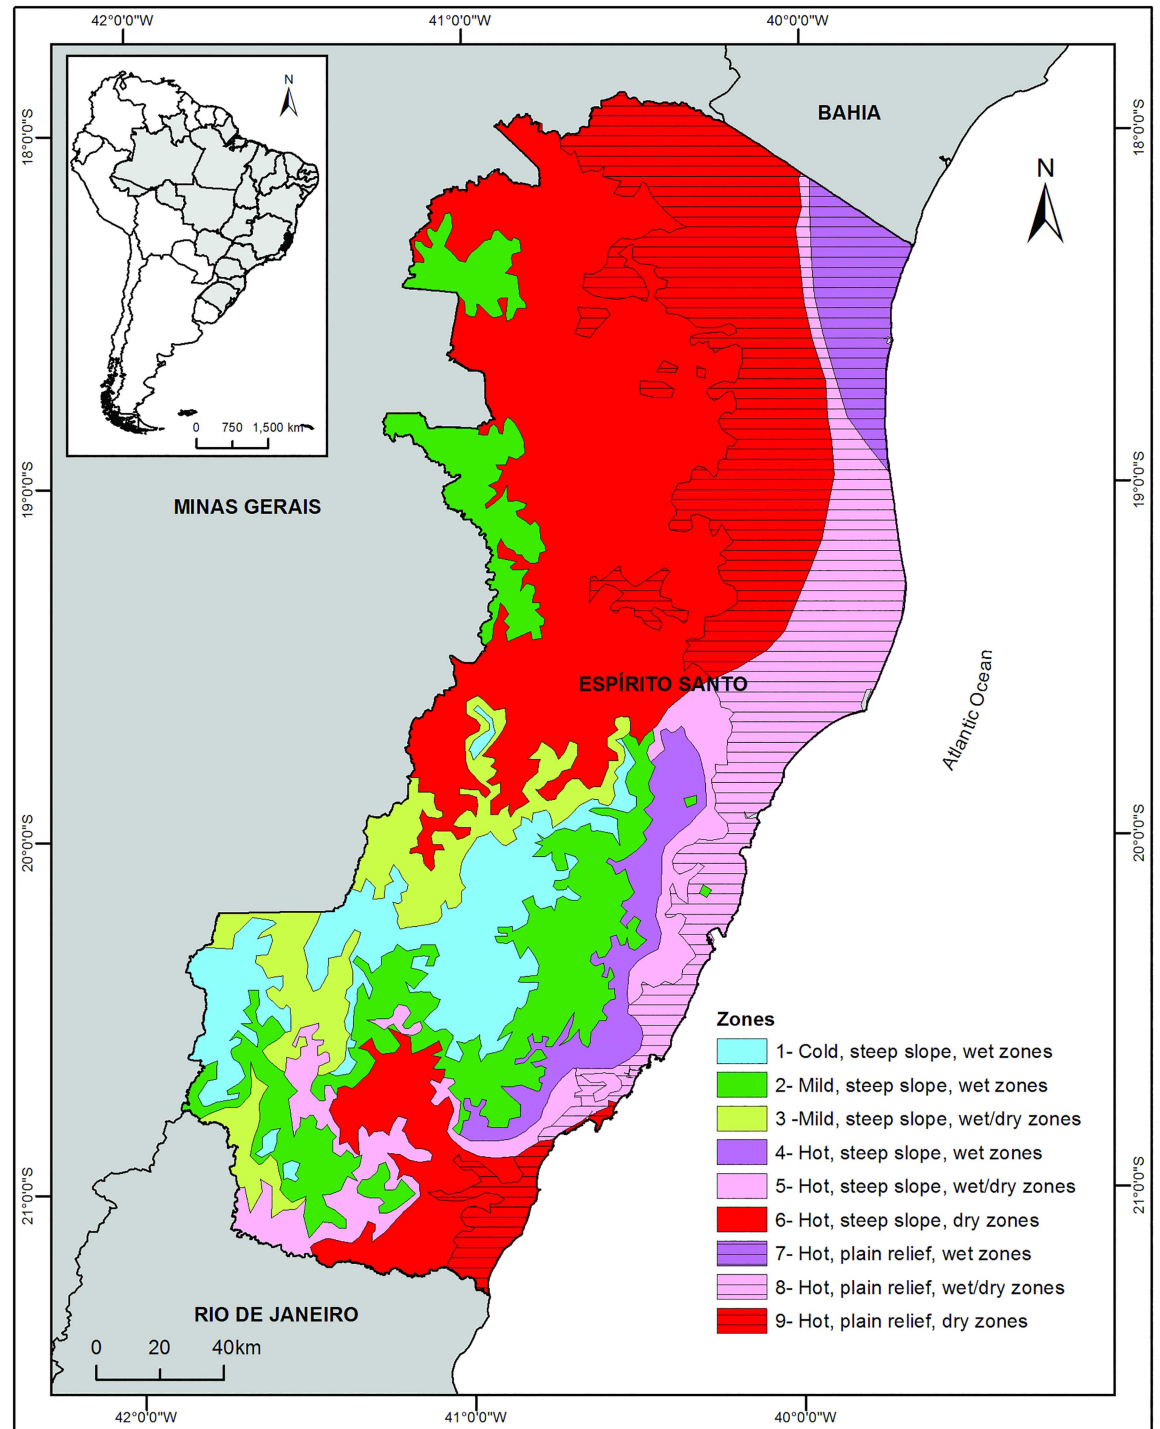

**Fig 1. Geographical location of the state of Espirito Santo, southeastern Brazil, South America and the geo-climatic zones.** By definition, a hot zone has a minimum average temperature of 11.8–18.0°C and a maximum of 30.7–34.0°C. A mild zone has a minimum average temperature of 9.4–11.8°C and a maximum of 27.8–30.7°C. A cold zone has a minimum average temperature of 7.3–9.4°C and a maximum of 25.3–27.8°C. A steep slope zone has a slope above 8%, and a plain relief occurs when the slope is below 8%. A wet zone has < 4 dry months per year, a wet/dry zone has 4–6 dry months, and a dry zone has > 6 dry months [21]. Datum: SIRGAS 2000.

doi:10.1371/journal.pone.0164580.g001

southern part of the Central Atlantic Forest Corridor, which is one of the main stretches of the dense ombrophilous forest found in this biome, presenting a high degree of endemism and species diversity [25].

## Entomological and epidemiological data

The occurrence data of phlebotomine sand fly species were obtained from samples taken in several rural areas of 78 municipalities of ES every year between 1997 and 2013. Each collection occurred during the first 3 hours after sunset through active and passive capture using a manual Castro-type suction tube and Centers for Disease Control and Prevention CO<sub>2</sub> trap (CDC) and Shannon light traps installed in the areas surrounding homes. During active surveillance, insects were collected from the internal and external walls of homes, home additions, animal shelters, and tree trunks. Sampling was performed by well-trained technicians, regardless of the occurrence of disease outbreak. The species identification and nomenclature were in accordance with Young and Duncan [26].

The localities and epidemiological data of the CL cases in ES were extracted from the medical records of patients cared for at Hospital Universitário Cassiano Antônio de Moraes (HUCAM) from 1978—when an effort began to initiate a careful and accurate identification of infection, with characteristics being detailed—to 2013. HUCAM is a reference hospital used in CL diagnosis and treatment for the municipalities of ES, centralizing every patient attendance, which verifies that the sample is representative of CL occurrence in that region. The type of information extracted from the medical records included geographical coordinates of the locality where the patient was infected.

## Environmental analysis

Environmental variables from the WorldClim database were used for the modelling, with an accuracy to within approximately 1 km [24]. This database comprises 19 bioclimatic variables derived from temperature and precipitation, as well as terrain elevation, and calculated the percent slope that is a measure of terrain inclination relative to the horizontal plan.

These WorldClim variables (<https://www.worldclim.org>) include the annual mean temperature (BIO1), mean diurnal range (BIO2), isothermality (BIO3), temperature seasonality (BIO4—standard-deviation\*100), maximum temperature of the warmest month (BIO5), minimum temperature of the coldest month (BIO6), temperature annual range (BIO7), mean temperature of the wettest quarter (BIO8), mean temperature of the driest quarter (BIO9), mean temperature of the warmest quarter (BIO10), mean temperature of the coldest quarter (BIO11), annual precipitation (BIO12), precipitation of the wettest month (BIO13), precipitation of the driest month (BIO14), precipitation seasonality (BIO15—coefficient of variation), precipitation of the wettest quarter (BIO16), precipitation of the driest quarter (BIO17), precipitation of the warmest quarter (BIO18), and precipitation of the coldest quarter (BIO19) [24].

The data for these bioclimatic variables were generated through interpolations of climate information from 1950 to 2000, obtained from approximately 50,000 weather stations distributed around the world [24]. The elevation data were obtained from the Shuttle Radar Topography Mission (SRTM) of the National Aeronautics and Space Administration (NASA). All variables had a 30-arc second (~1 km at the Equator) spatial resolution [24].

Spatial procedures of this study were performed using the Geographic Information System (GIS) ArcGIS ver. 10.1 (ESRI, Redlands, CA, USA) with Geocentric Reference System for the Americas (SIRGAS, 2000) data. All studied locations were georeferenced with a Global Positioning System (GPS).

## Environmental niche model of Phlebotominae species and CL

A maximum-entropy modelling approach using Maxent version 3.3.3k (<https://www.cs.princeton.edu/~schapire/maxent/>) was used to build potential distribution models of the five most common species, namely, *L. intermedia*, *L. migonei*, *L. whitmani*, *L. choti*, and *L. lenti* and the distribution of CL cases. Maxent is an a-based model from presence-background data that estimates a target probability distribution by finding the probability of distribution of maximum entropy. Maxent generates a “background” or “pseudo-absence” sample of the occurrence points. By default, 10,000 pseudo-absences are randomly selected from the entire rectangular study area [27]. Recently, this method has been widely used in species conservation studies. Similarly, these tools have been used in healthcare studies, presenting considerable development over the last 10 years [28–38].

The occurrence data for the species were separated into two sets, as follows: one set for the model calibration/training (75% of the occurrence localities) and the other set for the model evaluation/test (25% of the occurrence localities). The percentage contribution of each variable to the final model based on how much the variable contributed to the model dependent upon the path selected for a particular model run was provided by Maxent; in this heuristic approach, the contribution values are determined by the increase in gain in the model provided by each variable [27,39,40]. The model training and test procedure were replicated 10 times for each species, and the mean was calculated. The sampling technique used was Bootstrap, in which the training data are selected by sampling with replacement from the presence points, with the number of samples equalling the total number of presence points [40].

ENMtools version 1.3.3 (<http://enmtools.blogspot.com.br/>) was used to evaluate which species among those analysed in this study are more associated with the occurrence of the disease by overlapping the distribution of the vectors with the distribution of the CL cases. ENMtools overlaps the number of replicas generated by the Maxent software between individual species and cases of the disease using Schoener's D index calculation, which evaluates the similarity between these models. Schoener's D index was calculated with the construction of 10 replicates for each evaluated model, and therefore, 100 values of this index were obtained by analysing the overlap. The mean of this index was also compared to assess which species present a greater degree of niche overlap within the area of CL occurrence in the state of ES [41].

## Statistical analysis

The validation of the models was performed using the receiver operating characteristic (ROC) curve, in which the true positive fractions are plotted against the false positive fractions. The area under the curve (AUC) is used as a measure of accuracy of the model [39,42].

The AUC values range from 0.5 to 1.0. The classification system for the AUC provided by Hosmer and Lemeshow was used in the current study. That system classifies the AUC values as follows: 0.5–0.6 = no discrimination, 0.6–0.7 = poor discrimination, 0.7–0.8 = acceptable discrimination, 0.8–0.9 = excellent discrimination, and 0.9–1.0 = outstanding discrimination [43].

The Kolmogorov-Smirnov test was performed to determine the normality for Schoener's D data and the variables' percentage contribution distribution. The Kruskal-Wallis test with post-hoc Dunn's test was used to compare the medians of this indicator between species. The Kruskal-Wallis test followed by the Student-Newman-Keuls test was used to compare the percentage contribution of the five most important variables in the model construction. The significance level adopted was 5%.



## Ethics statements

The study was approved by the Human Research Ethics Committee of the Health Sciences Centre of the Federal University of Espirito Santo (UFES) (opinion no. 494.029 from 13 December 2013). Patient information was anonymized and de-identified prior to analysis. The insects were collected on private lands with the permission of the landowners. No endangered species or protected areas were involved.

## Results

### Descriptive analysis

In total, 249,783 specimens belonging to 43 species of phlebotomine sand flies were collected at 466 localities during the period between 1997 and 2013, covering all geo-climatic zones of the state of ES (Fig 2, S1 Table) [23].

### ENM of the main species of phlebotomine sand flies

For the construction of the environmental niche models of the main vectors of the disease, the five species of phlebotomine sand flies most commonly reported in the state of ES were selected: *L. intermedia*, *L. migonei*, *L. choti*, *L. lenti*, and *L. whitmani*, excluding *L. longipalpis*, which is a vector of visceral leishmaniasis (Fig 3).

The AUCs were greater than 0.80, indicating excellent discrimination for *L. migonei*, *L. choti*, *L. lenti*, and *L. whitmani* (Table 1). The model was also considered acceptable for *L. intermedia*; however, the average AUC was lower than the averages of the other species (0.78).

According to the analysis of the variables using the percent contribution heuristic test, all species showed high sensitivity to temperature, precipitation, elevation, and slope. Therefore, slope was an important predictor and contributed 37.85%, 33.62%, 20.32%, 15.61%, and 11.28% for the species *L. intermedia*, *L. whitmani*, *L. migonei*, *L. choti*, and *L. lenti*, respectively (S2 Table).

Regarding the other variables, *L. intermedia* and *L. migonei* showed similarities in the construction of their models. Slope, BIO13, BIO12, BIO5, and elevation contributed 71.71% to the construction of the model for *L. intermedia*, whereas slope, BIO13, BIO16, elevation, and BIO12 contributed 59.31% to the construction of the model for *L. migonei*.

*Lutzomyia lenti* and *L. whitmani* also presented similarities. BIO15, slope, BIO13, BIO16, and BIO11 contributed 69.27% to the construction of the model for *L. lenti*, whereas slope, BIO4, BIO13, BIO15, and BIO5 contributed 79.36% to the construction of the model for *L. whitmani*. Except for slope, *L. choti* did not present similarities with the other species. Slope, BIO4, BIO18, elevation, and BIO17 contributed 66.05% to the construction of the model for this species (Table 2).

### ENM of CL occurrence area

In total, 1,472 autochthonous human cases of CL were reported between 1978 and 2013. Among these cases, 1,264 (85.9%) presented cutaneous lesions, 49 (3.3%) presented mucocutaneous lesions, and 159 (10.8%) presented mucosal lesions. The model constructed in the current study shows that this disease occurs in the south-central region of the state of ES and is limited to areas below 1,119 metres; however, only 17 (4.76%) of 357 occurrence localities were related in elevation above 850 metres (Fig 4).

The model was considered excellent, with an AUC of  $0.817 \pm 0.020$ . The variables BIO4, BIO12, slope, BIO14, and BIO5 contributed 70.31% of the model construction (Table 3, S2 Table).

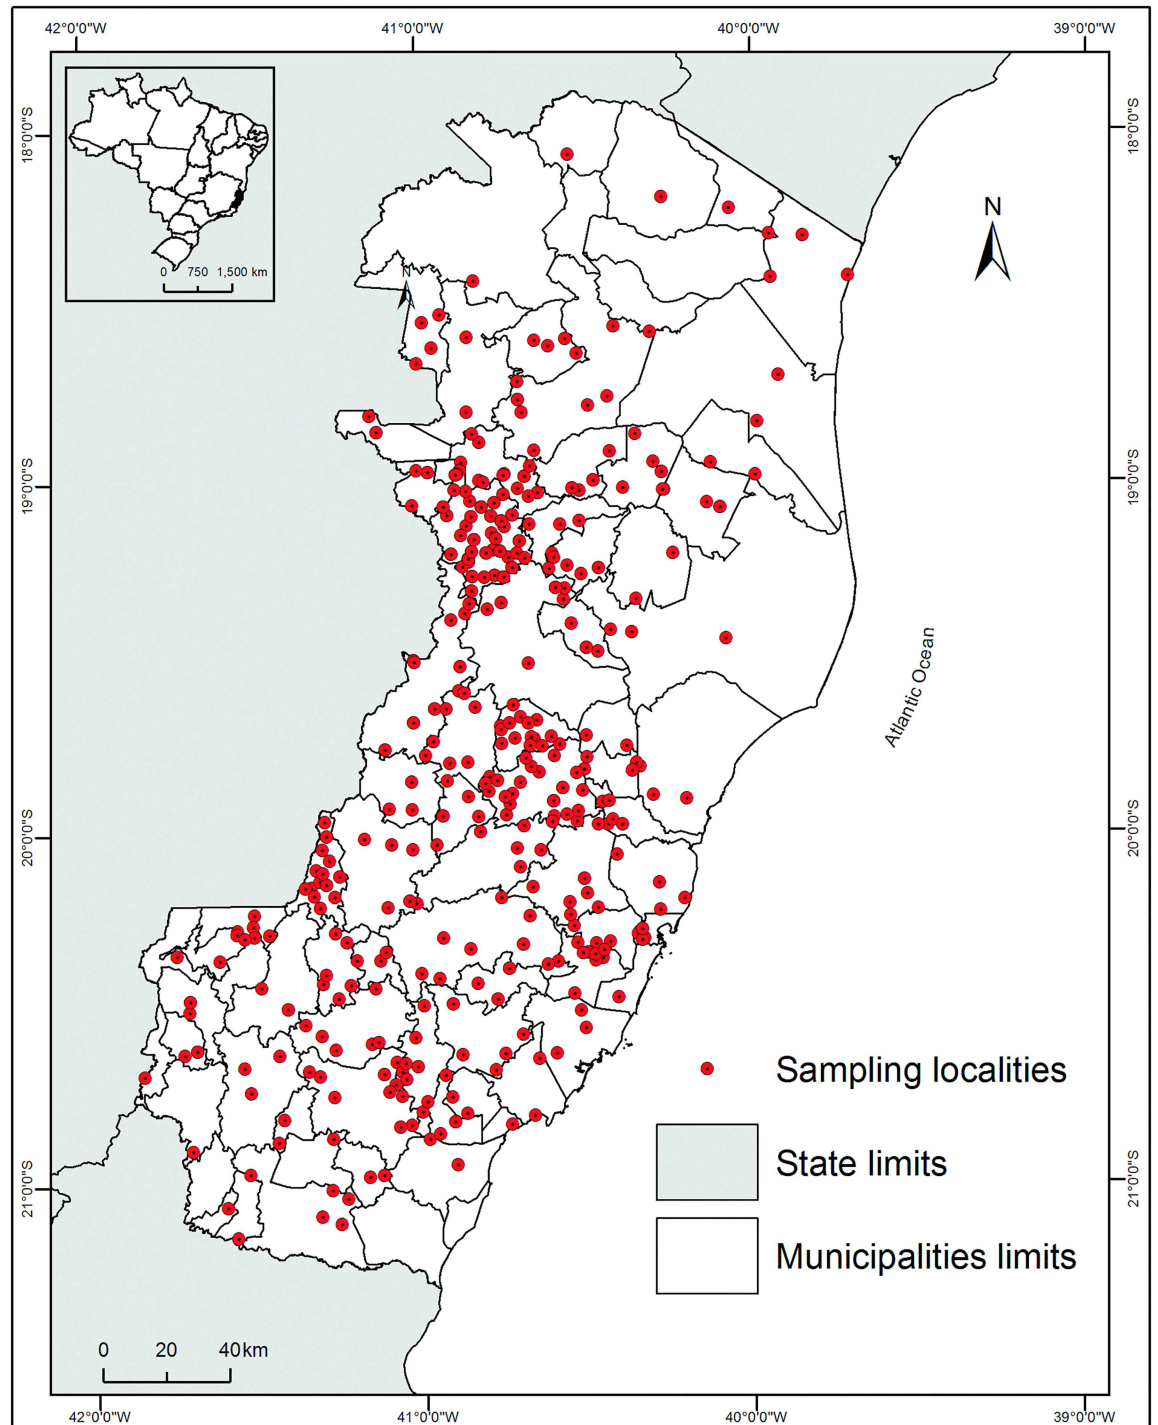

**Fig 2. Sampling localities of phlebotomine sand flies in rural locations in the state of Espírito Santo, southeastern Brazil, during the period between 1997 and 2013. Datum: SIRGAS 2000.**

doi:10.1371/journal.pone.0164580.g002

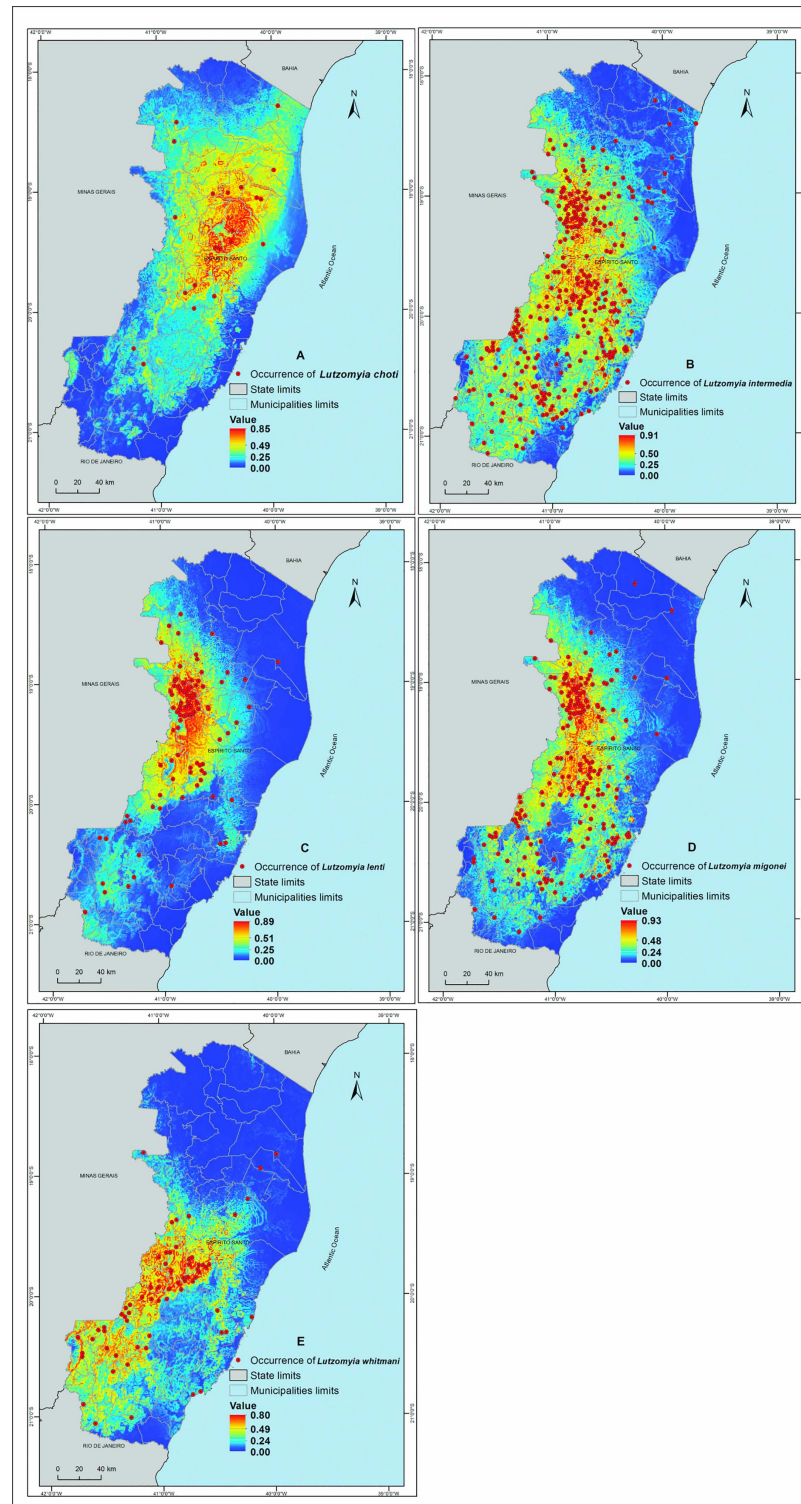

**Fig 3. Predicted ecological niche distribution of five most frequent Phlebotominae species in the state of Espírito Santo, southeastern Brazil, during the period between 1997 and 2013. (A) *Lutzomyia choti*, (B) *Lutzomyia intermedia*, (C) *Lutzomyia lentii*, (D) *Lutzomyia migonei* and (E) *Lutzomyia whitmani*. The species occurrence probability is expressed with values ranging from 0 to 1. Datum: SIRGAS 2000.**

doi:10.1371/journal.pone.0164580.g003



**Table 1. Number of occurrence localities of phlebotomine sand fly species collected in rural locations in the state of Espírito Santo.** The mean value and standard deviation (sd) for the AUC are reported.

| Variable                    | Number of occurrences | AUC mean (sd) |
|-----------------------------|-----------------------|---------------|
| <i>Lutzomyia intermedia</i> | 404                   | 0.780 (0.025) |
| <i>Lutzomyia migonei</i>    | 255                   | 0.837 (0.027) |
| <i>Lutzomyia choti</i>      | 24                    | 0.824 (0.078) |
| <i>Lutzomyia lenti</i>      | 123                   | 0.857 (0.033) |
| <i>Lutzomyia whitmani</i>   | 68                    | 0.815 (0.053) |

doi:10.1371/journal.pone.0164580.t001

### Overlap between the distribution of human CL cases and Phlebotominae species

Values of Schoener's D range from 0 (no overlap) to 1 (perfect overlap). This indicator was compared between species to evaluate which one is most involved in disease transmission (Table 4). The Kruskal-Wallis and Dunn tests (multiple comparisons) were used to define the importance of each species. In the state of ES, the *L. intermedia* model showed significantly higher overlap, indicating that it is more associated with the disease transmission than secondary vectors such as *L. migonei* and *L. whitmani* ( $p < 0.05$ ), with no difference between the latter two species ( $p > 0.05$ ), followed by *L. lenti* and *L. choti*, most likely without epidemiological importance in the transmission.

### Discussion

This is the first study to build and associate environmental niche models using algorithms between vector species and autochthonous CL cases in endemic areas of south-eastern Brazil.

Environmental modelling research focused on public health is under considerable development in Brazil and worldwide. In Portugal, Spain, France, and Italy, studies have mapped the environmental risk of visceral leishmaniasis, using the potential distribution of canine leishmaniasis and their vectors [28,29,30]. In North America, the risk of leishmaniasis from the ENM of vectors and reservoirs has been evaluated to explain the expansion of the disease in Mexico [31]. In Colombia, South America, future projections of the *Leishmania infantum* (Nicole, 1908) spatial distribution have been studied [32]. Aparicio and Bitencourt modelled the risk areas for CL in the municipality of Itapira, São Paulo [34]. Almeida et al. evaluated the potential distribution of *Lutzomyia longipalpis* and cases of visceral leishmaniasis in Mato Grosso do Sul [35]. Nieto and collaborators used the modelling to define environmental niches of visceral leishmaniasis in Bahia [36]. Peterson and Shaw investigated niche models and effects of climate change in

**Table 2. Environmental variable values of the sample sites of five phlebotomine species in the state of Espírito Santo, Brazil, 1997–2013.** The mean value and standard deviation (sd) for each variable are reported.

| Species                                 | Environmental variables |              |              |              |                 |                |                          |
|-----------------------------------------|-------------------------|--------------|--------------|--------------|-----------------|----------------|--------------------------|
|                                         | Elevation (m)           | Slope (%)    | BIO4 (sd)    | BIO5 (°C)    | BIO12 (mm)      | BIO13 (mm)     | BIO15 (cv <sup>a</sup> ) |
| <i>Lutzomyia intermedia</i> (mean ± sd) | 333.10 (271.74)         | 6.57 (5.12)  | 16.62 (1.25) | 30.92 (1.46) | 1190.12 (65.61) | 198.50 (12.18) | 59.00 (6.39)             |
| <i>Lutzomyia migonei</i> (mean ± sd)    | 346.15 (267.76)         | 6.67 (4.81)  | 16.55 (1.22) | 30.91 (1.46) | 1192.39 (62.79) | 199.57 (11.31) | 59.73 (6.14)             |
| <i>Lutzomyia whitmani</i> (mean ± sd)   | 443.53 (310.76)         | 7.84 (4.96)  | 17.51 (1.04) | 30.52 (1.65) | 1217.40 (71.80) | 206.38 (14.18) | 59.93 (5.88)             |
| <i>Lutzomyia choti</i> (mean ± sd)      | 252.67 (726.16)         | 5.62 (14.95) | 16.03 (0.02) | 30.93 (9.65) | 1197.38 (15.59) | 192.00 (54.78) | 55.25 (7.17)             |
| <i>Lutzomyia lenti</i> (mean ± sd)      | 265.58 (188.90)         | 5.95 (4.77)  | 16.05 (1.12) | 31.42 (1.00) | 1174.86 (43.97) | 197.93 (8.97)  | 62.11 (4.06)             |

<sup>a</sup>cv, coefficient of variation.

doi:10.1371/journal.pone.0164580.t002

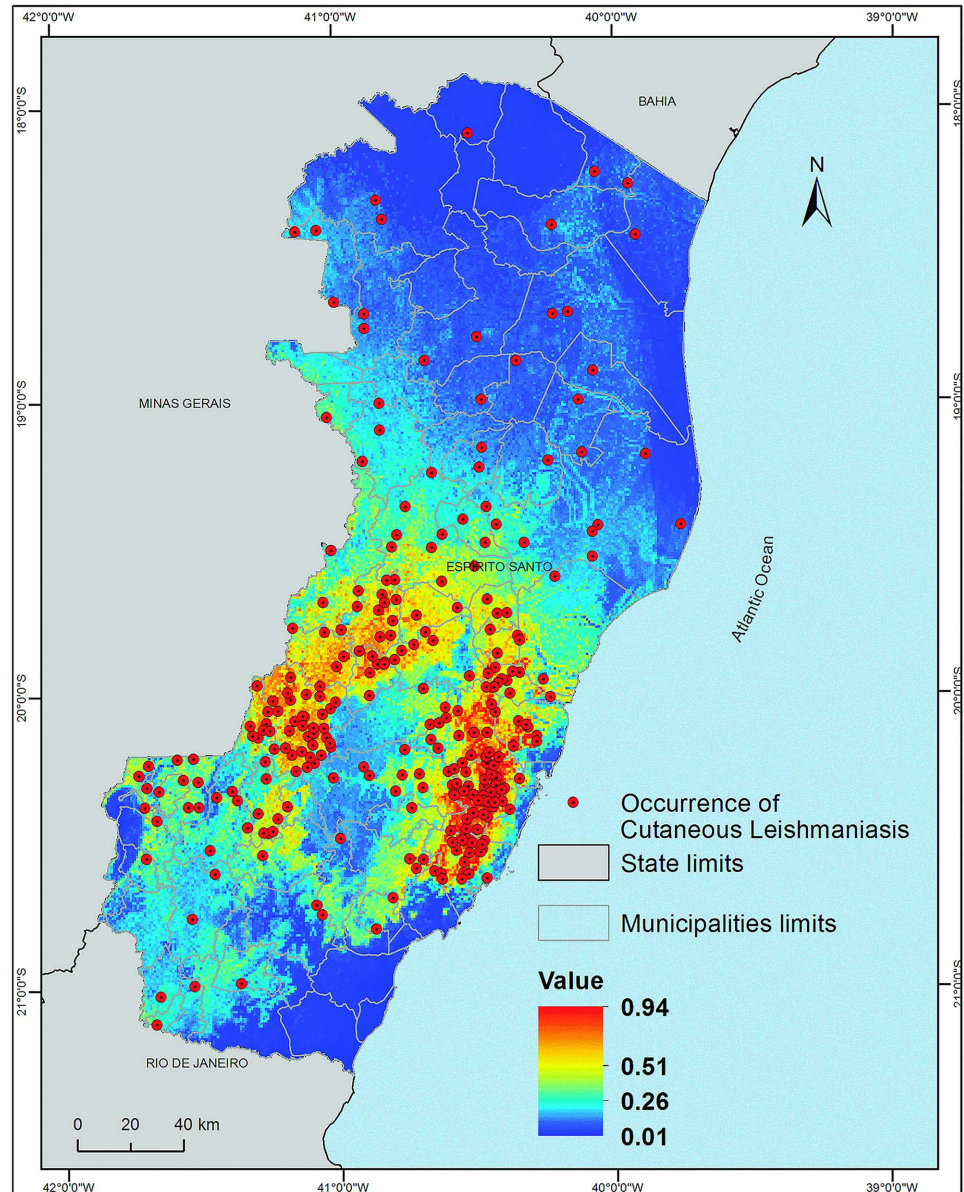

**Fig 4. Predicted distribution of the ecological niche of the area of occurrence of autochthonous human cases of cutaneous leishmaniasis in the state of Espírito Santo, Brazil, 1978–2013.** Datum: SIRGAS 2000.

doi:10.1371/journal.pone.0164580.g004

vectors of CL distribution in southeastern Brazil [37]. Almeida and Werneck evaluated predictive areas of high risk for visceral leishmaniasis in the city of Teresina, Piauí [38].

The current study revealed that *L. intermedia* was the species most associated with the occurrence of CL in the state of ES, followed by the secondary vectors *L. migonei* and *L. whitmani*. However, the species *L. lenti* and *L. choti* were not considered important vectors of the disease in that region.

*Lutzomyia intermedia* has been indicated as the main vector of CL in the state of ES [9,10]. This species is abundant in endemic areas of southeastern Brazil, and specimens have been naturally infected by *Leishmania (Viannia) braziliensis* Vianna, 1911 [5,11,44–46]. This species is

**Table 3. Mean and standard deviation of the most relevant environmental variables of the occurrence of cutaneous leishmaniasis in the state of Espírito Santo, Brazil, 1978–2013.**

| Variable    | Elevation (m)   | Slope (%)   | BIO4 (sd)    | BIO5 (°C)    | BIO12 (mm)      | BIO13 (mm)     | BIO15 (cv <sup>a</sup> ) |
|-------------|-----------------|-------------|--------------|--------------|-----------------|----------------|--------------------------|
| Mean (sd)   | 317.80 (281.81) | 6.41 (5.15) | 17.13 (0.91) | 30.84 (1.37) | 1188.53 (62.04) | 197.36 (13.10) | 54.47 (7.62)             |
| Upper bound | 1,119.00        | 30.85       | 20.05        | 33.50        | 1375.00         | 234.00         | 70.00                    |
| Lower bound | 1.00            | 0.04        | 14.81        | 26.20        | 1026.00         | 166.00         | 38.00                    |

<sup>a</sup>cv, coefficient of variation.

doi:10.1371/journal.pone.0164580.t003

more associated with domiciles and peridomiciles and is strongly attracted to domestic dogs and horses [8–9,10,47]. Studies suggest that this species is adapted to habitats modified by human activity and presents a high degree of anthropophily and endophily [45,47].

*Lutzomyia migonei* has been considered a secondary vector of CL in anthropic environments, with occurrence at altitudes above 750 m in ES [11]. This species has an affinity for humans and domestic dogs. A study conducted in the municipality of Afonso Cláudio (mid-western region of the state) revealed that *L. migonei* is the most common species found inside the domicile [45,47–48].

*Lutzomyia whitmani* has also been considered a secondary vector of CL, with high density in the endemic areas of the states of São Paulo, Minas Gerais, and ES [11,49–50]. This species is more abundant in protected forest areas. Recent studies have identified this species in peridomiliary areas, especially in domestic animal shelters [9,11,45,47]. This species has been implicated as being responsible for the link between the wild environment and areas surrounding homes; however, it has a low propensity to invade households.

Rocha et al. [51] suggested that a greater genetic diversity of *Leishmania braziliensis* is observed in areas of remaining forests due to the larger number of reservoirs and vector species, mainly *L. intermedia* and *L. whitmani*. However, in peri-urban areas, *L. intermedia* is the only vector, and domestic dogs are the reservoirs, a situation that reduces the diversity of the protozoa in this area. This reinforces the idea that *L. whitmani* is a connecting vector between the preserved and anthropic environments.

*Lutzomyia lenti* and *L. choti* have no association with the occurrence of CL. Despite its occurrence in all regions of Brazil, with a wide distribution and abundance, *L. lenti* has not been reported as an important vector in endemic areas of the state of ES. This species has been found in the mid-western region of the country in areas surrounding houses in the state of Mato Grosso do Sul and Goiás, mainly in domestic animal shelters [52–55]. A positive association between this species and cases of CL was observed in the state of Goiás [53]. *Lutzomyia choti* is a species with heterogeneous habitats and is present in both wild environments and

**Table 4. Schoener's D mean and standard deviation for the overlap between 10 replicas of the models of Phlebotominae species and 10 replicas of the cutaneous leishmaniasis model.**

| Phlebotominae species       | Schoener's D*              |
|-----------------------------|----------------------------|
| <i>Lutzomyia intermedia</i> | 0.725 (0.019) <sup>a</sup> |
| <i>Lutzomyia migonei</i>    | 0.688 (0.023) <sup>b</sup> |
| <i>Lutzomyia whitmani</i>   | 0.675 (0.044) <sup>b</sup> |
| <i>Lutzomyia lenti</i>      | 0.582 (0.050) <sup>c</sup> |
| <i>Lutzomyia choti</i>      | 0.561 (0.055) <sup>c</sup> |

\* Different letters indicate statistically significant differences between groups.

doi:10.1371/journal.pone.0164580.t004

areas surrounding houses. However, no records exist of natural infection in this species by *L. (V.) braziliensis*. In addition, this species has not been observed in the main endemic areas of the state of ES. Brandão-Filho et al. [56] suggested that this species may be associated with the occurrence of CL cases in Pernambuco, northeast Brazil, due to its predominance in the Zona da Mata area of the state.

Regarding the ecological niches constructed in this study, slope was a relevant variable in the occurrence of all species of phlebotomine sand flies. Areas with steep slopes have dimples, which allow a greater variability of water and organic matter accumulation, as well as a reduction in sunlight and wind exposure, thereby creating a greater diversity of habitats; this diversity in habitats contributes to the maintenance of food and shelter conditions for these insects [33].

*Lutzomyia whitmani* is limited to the western region of the state, which has lower precipitation rates, higher elevations, steep slopes, and low temperatures. *Lutzomyia intermedia* is found in warmer areas with lower slope gradients and lower elevations. In addition, this species is less susceptible to temperature and rainfall variations. *Lutzomyia migonei* presents a distribution between *L. intermedia* and *L. whitmani* and is concentrated in the mid-western region of the state of ES.

Elevation appears to be inversely proportional to the abundance of phlebotomine sand flies [9,11,51,57]. In the current study, *L. intermedia* was collected at 1,123 m above sea level but at low density, suggesting the importance of vector density in the occurrence of disease cases in a particular region.

The precipitation and maximum temperature of the warmest month were also relevant to the construction of the models. Temperature and humidity have positive effects on the activity and abundance of phlebotomine sand flies, which depends on the species [47,58]. In the neighbouring state of Rio de Janeiro, *L. whitmani* was more abundant in colder and drier months (June, July, and August), whereas *L. intermedia* was more abundant in the warmer months of the year (December, January, and February). These data are in agreement with previous studies performed by Souza et al. [47] and Costa et al. [49].

The variables of precipitation seasonality and temperature seasonality were considered important in the occurrence of *L. whitmani*, with the latter being more tolerant to variations in temperature and precipitation [18,49].

The temporal mismatch between the species distribution data (1997–2013), the cases data (1978–2013), and climate data (1950–2000) did not significantly affect the modelling results because during the last 50 years, there have been no important environmental changes in peridomestic areas in endemic areas of CL in ES. Furthermore, the geographic expansion of the disease occurred from the migration of rural populations to the outskirts of the cities in the 1980s, carrying infected dogs from the western area to east of ES, where vector species were already adapted to the peridomestic [12,14].

A low sandfly frequency in some areas of the state did not influence the species environmental modelling because this method can provide a measure of potential species occurrence in areas not covered by biological surveys and consequently, has become an interesting tool for healthy planning [27].

Maxent presented a strong performance compared with different methods because it performed well and remained stable with respect to the prediction accuracy and the total area predicted, indicating that Maxent can compensate for small species occurrence data sets [59].

The results of the current study indicate that modelling and geoprocessing tools enable a reliable analysis of the association between geo-climatic variables, geographic distribution of vectors, and CL cases in the state of ES. The definition of areas at potential risk for CL transmission allows us to make available relatively accurate information at the regional level that

can guide entomological and epidemiological surveillance activities to control the geographic expansion of this endemic disease in vulnerable locations.

## Supporting Information

**S1 Table. Specimens of phlebotomine sand flies belonging to the 10 most common species collected in the state of Espírito Santo, southeastern Brazil, during the period between 1997 and 2013.**

(DOCX)

**S2 Table. Average percentage contribution for five most important environmental variables for each species and CL case.**

(DOCX)

## Acknowledgments

We thank the team from Tropical Medicine at the UFES and the team from the Nucleus of Entomology and Malacology of the Espírito Santo State Health Secretariat (NEMES/SESA). We are also especially grateful to the HUCAM for its support with the access to records.

## Author Contributions

**Conceptualization:** VCM AF.

**Data curation:** VCM.

**Formal analysis:** VCM AF BF GRL CBS.

**Funding acquisition:** AF.

**Investigation:** VCM AF BF GRL CBS.

**Methodology:** VCM AF BF GRL CBS.

**Project administration:** VCM AF BF.

**Resources:** VCM AF BF GRL CBS.

**Supervision:** VCM AF BF.

**Validation:** VCM AF.

**Visualization:** VCM AF BF GRL CBS.

**Writing – original draft:** VCM.

**Writing – review & editing:** VCM AF BF GRL CBS.

## References

1. Aguiar GM, Medeiros WM. Distribuição regional e habitats das espécies de flebotomíneos do Brasil. In: Rangel EF, Lainson R, editors. *Flebotomíneos do Brasil*. Rio de Janeiro: Fiocruz; 2003. pp. 207–255.
2. Sacks D, Lawyer P, Kamhawi S. The biology of *Leishmania*-sandfly interactions. In: Myler P, Fasel N, editors. *Leishmania after the genome*. Norfolk, UK: Caister Academic Press; 2008. p. 205.
3. Rangel EF, Lainson R. Ecologia das Leishmanioses: Transmissores de Leishmaniose Tegumentar Americana. In: Rangel EF, Lainson R, editors. *Flebotomíneos do Brasil*. Rio de Janeiro: Fiocruz; 2003. pp. 291–310.



4. Brasil. Ministério da Saúde (MS). Secretaria de Vigilância em Saúde. Manual de Vigilância da Leishmaniose Tegumentar Americana. Brasília/DF: MS; 2007.
5. Virgens TM, Santos CB, Pinto IS, Silva KS, Leal FC, Falqueto A. Fauna de flebotomíneos (Diptera: Psychodidae) em área de transmissão de leishmaniose tegumentar americana no norte do Estado do Espírito Santo, Brasil. *Cad Saúde Pública*. 2008; 24: 2969–2978.
6. Vieira VP, Ferreira AL, Santos CB, Leite GR, Ferreira GEM, Falqueto A. Peridomestic Breeding Sites of Phlebotomine Sand Flies (Diptera: Psychodidae) in an Endemic Area of American Cutaneous Leishmaniasis in Southeastern Brazil. *Am. J. Trop. Med. Hyg.* 2012; 87: 1089–1093. doi: [10.4269/ajtmh.2012.12-0470](https://doi.org/10.4269/ajtmh.2012.12-0470) PMID: [23091196](https://pubmed.ncbi.nlm.nih.gov/23091196/)
7. Sessa PA, Barros GC, Mattos EA, Carias VRD, Alencar JTA, Delmaestro D et al.... Distribuição Geográfica da Leishmaniose Tegumentar Americana no Estado do Espírito Santo—Brasil. *Rev Soc Bras Med Trop*. 1985; 18: 237–241.
8. Falqueto A, Coura JR, Barros GC, Grimaldi Filho G, Sessa PA, Carias VRD et al. Participação do cão no ciclo de transmissão da Leishmaniose Tegumentar no município de Viana, Estado do Espírito Santo, Brasil. *Mem Inst Oswaldo Cruz*. 1986; 81: 155–163.
9. Sessa PA, Falqueto A, Varejão JBM. Tentativa de Controle da Leishmaniose Tegumentar Americana por Meio do Tratamento de Cães Doentes. *Cad Saúde Pública*. 1994; 4: 457–463.
10. Falqueto A, Sessa PA, Varejão JBM, Barros GC, Momen H, Grimaldi G Jr.. Leishmaniasis due to *Leishmania braziliensis* in Espírito Santo state, Brazil. Further evidence on the role of dogs as a reservoir of infection for humans. *Mem Inst Oswaldo Cruz*. 1991; 86: 499–500. PMID: [1842452](https://pubmed.ncbi.nlm.nih.gov/1842452/)
11. Ferreira AL, Sessa PA, Varejão JBM, Falqueto A. Distribution of Sand Flies (Diptera: Psychodidae) at Different Altitudes in an Endemic Region of American Cutaneous Leishmaniasis in the State of Espírito Santo, Brazil. *Mem Inst Oswaldo Cruz*. 2001; 96: 1061–1067. PMID: [11784923](https://pubmed.ncbi.nlm.nih.gov/11784923/)
12. Falqueto A, Sessa PA, Ferreira AL, Vieira VP, Santos CB, Varejão JBM et al. Epidemiological and Clinical Features of *Leishmania (Viannia) braziliensis* American Cutaneous and Mucocutaneous. *Mem Inst Oswaldo Cruz*. 2003; 98: 1003–1010.
13. Roque ALR, Jansen AM. Wild and synanthropic reservoirs of *Leishmania* species in the Americas. *Int J Parasitol Wildl*. 2014; 3: 251–262.
14. Governo do Estado do Espírito Santo (ES). Secretaria de Estado da Economia e Planejamento. Instituto Jones dos Santos Neves. Dinâmica Urbano Regional do Estado do Espírito Santo. Vitória: IJSN; 2011.
15. Shimabukuro PHF, Galati EAB. Checklist dos Phlebotominae (Diptera, Psychodidae) do estado de São Paulo, Brasil, com comentários sobre sua distribuição geográfica. *Biota Neotrop*. 2011; 11: 685–704.
16. Pinto IS, Tonini JFR, Ferreira AL, Falqueto A. A brief inventory of sand flies (Diptera, Psychodidae) from the National Forest of the Rio Preto, state of the Espírito Santo, southeastern Brazil. *Biota Neotrop*. 2012; 12: 323–326.
17. Forattini OP, Rabello EX, Serra OP, Contrim MD, Galati EA, Barata JM. Transmission of cutaneous leishmaniasis in the State of São Paulo, Brazil. *Rev Saúde Pública*. 1976; 10: 31–43. PMID: [945608](https://pubmed.ncbi.nlm.nih.gov/945608/)
18. Peterson AT, Shaw J. *Lutzomyia* vectors for cutaneous leishmaniasis in Southern Brazil: ecological niche models, predicted geographic distributions, and climate change effects. *Int J Parasitol*. 2003; 33: 919–931. PMID: [12906876](https://pubmed.ncbi.nlm.nih.gov/12906876/)
19. Saraiva L, Carvalho GML, Sanguinette CC, Carvalho DAA, Andrade Filho JD. Biogeographical aspects of the occurrence of *Nyssomyia neivai* and *Nyssomyia intermedia* (Diptera: Psychodidae) in a sympatric area of the Brazilian savannah. *Mem Inst Oswaldo Cruz*. 2012; 107: 867–872. PMID: [23147141](https://pubmed.ncbi.nlm.nih.gov/23147141/)
20. Aparicio C, Bitencourt MD. Spacial modeling of Cutaneous Leishmaniasis risk zones. *Rev Saude Publica*. 2004; 38: 511–516. doi: [/S0034-89102004000400005](https://doi.org/S0034-89102004000400005) PMID: [15311290](https://pubmed.ncbi.nlm.nih.gov/15311290/)
21. World Health Organization (WHO). Leishmaniasis. Fact sheet n. 375. Vitória: WHO; 2015.
22. Aragão MB. A epidemiologia paisagística no Brasil. *Cad Saude Publica*. 1988; 1: 106–109.
23. Feitoza LR, Stocking M, Resende M. Natural resources information systems for rural development: approaches for Espírito Santo state, Brazil. Vitória: Incaper; 2001.
24. Hijmans RJ, Cameron SE, Parra JL, Jones PG, Jarvis A. Very high resolution interpolated climate surfaces for global land areas. *Int J Climatol*. 2005; 25:1965–1978.
25. Tabarelli M, Pinto LP, Silva JMC, Hirota M, Bedê L. Challenges and opportunities for biodiversity conservation in the Brazilian Atlantic Forest. *Conserv Biol*. 2005; 19: 695–700.

26. Young DG, Duncan MA. Guide to the identification and geographic distribution of *Lutzomyia* sand flies in the Mexico, the West Indies, Central and the South America (Diptera: Psychodidae). Mem Am Entomol Inst. 1994; 54: 881p.
27. Phillips SJ, Anderson RP, Schapire RE. Maximum entropy modeling of species geographic distributions. Ecol Model. 2006; 190: 231–259.
28. Chamaillé L, Tran A, Meunier A, Bourdoiseau G, Ready P, Dedet J. Environmental risk mapping of canine leishmaniasis in France. Parasit Vectors. 2010; 3: 1–8.
29. Fischer D, Thomas SM, Beierkuhnlein C. Modelling climatic suitability and dispersal for disease vectors: the example of a phlebotomine sandfly in Europe. Procedia Environ Sci. 2011; 7: 164–169.
30. Franco AO, Davies CR, Mylne A, Dedet J, Gállego M, Ballart C et al. Predicting the distribution of canine leishmaniasis in western Europe based on environmental variables. Parasitology. 2011; 138: 1878–1891. doi: [10.1017/S003118201100148X](https://doi.org/10.1017/S003118201100148X) PMID: [21914251](https://pubmed.ncbi.nlm.nih.gov/21914251/)
31. González C, Wang O, Strutz SE, González-Salazar C, Sánchez-Cordero V, Sarkar S. Climate change and risk of leishmaniasis in North America: predictions from ecological niche models of vector and reservoir species. Plos Negl Trop Dis. 2010; 4: 1–16.
32. González C, Paz A, Ferro C. Predicted altitudinal shifts and reduced spatial distribution of *Leishmania infantum* vector species under climate change scenarios in Colombia. Acta Trop. 2014; 129: 83–90. doi: [10.1016/j.actatropica.2013.08.014](https://doi.org/10.1016/j.actatropica.2013.08.014) PMID: [23988300](https://pubmed.ncbi.nlm.nih.gov/23988300/)
33. Leite GR, Santos CB, Falqueto A. Influence of the landscape on dispersal of sylvatic triatomines to anthropic habitats in the Atlantic Forest. J Biogeogr. 2011; 38: 651–663.
34. Aparicio C, Bitencourt MD. Modelagem espacial de zonas de risco da leishmaniose tegumentar americana. Rev Saúde Pública. 2004; 38: 511–516.
35. Almeida PS, Sciamarelli A, Batista PM, Ferreira AD, Nascimento J, Raizer J et al. Predicting the geographic distribution of *Lutzomyia longipalpis* (Diptera: Psychodidae) and visceral leishmaniasis in the state of Mato Grosso do Sul, Brazil. Mem Inst Oswaldo Cruz. 2013; 108: 992–996. doi: [10.1590/0074-0276130331](https://doi.org/10.1590/0074-0276130331) PMID: [24402151](https://pubmed.ncbi.nlm.nih.gov/24402151/)
36. Nieto P, Malone JB, Bavia ME. Ecological niche modeling for visceral leishmaniasis in the state of Bahia, Brazil, using genetic algorithm for rule-set prediction and growing degree day-water budget analysis. Geospatial Health. 2006; 1: 115–126. doi: [10.4081/gh.2006.286](https://doi.org/10.4081/gh.2006.286) PMID: [18686237](https://pubmed.ncbi.nlm.nih.gov/18686237/)
37. Peterson AT, Shaw J. *Lutzomyia* vectors for cutaneous leishmaniasis in Southern Brazil: ecological niche models, predicted geographic distributions, and climate change effects. Int J Parasitol. 2003; 33: 919–931. PMID: [12906876](https://pubmed.ncbi.nlm.nih.gov/12906876/)
38. Almeida AS, Werneck GL. Prediction of high-risk areas for visceral leishmaniasis using socioeconomic indicators and remote sensing data. International Journal of Health Geographics, v.12, n.13, p. 1–7, 2014.
39. Dutra GC, Carvalho LMT. Modelos de distribuição geográfica de *Amaioua guianensis* Aubl. em Minas Gerais, Brasil. Ambiência. 2008: 47–55.
40. Phillips, S.J. A brief tutorial on Maxent, versions: 3.3.1. 2016. Available: <http://www.cs.princeton.edu/~schapire/maxent/>.
41. Warren DL, Glor RE, Turelli M. Environmental niche equivalency versus conservatism: quantitative approaches to niche evolution. Evolution. 2008; 62: 2868–2883. doi: [10.1111/j.1558-5646.2008.00482.x](https://doi.org/10.1111/j.1558-5646.2008.00482.x) PMID: [18752605](https://pubmed.ncbi.nlm.nih.gov/18752605/)
42. Fielding AH, Bell JF. A review of methods for the assessment of prediction errors in conservation presence/absence models. Environ Conserv. 1997; 24: 38–49.
43. Hosmer DW, Lemeshow S. Applied Logistic Regression. New York: Wiley; 2000.
44. Rangel EF, Sousa NA, Wermelinger ED, Barbosa AF. Infecção natural de *Lutzomyia intermedia* Lutz & Neiva, 1912, em área endêmica de leishmaniose tegumentar no Rio de Janeiro. Mem Inst Oswaldo Cruz. 1984; 79: 395–396.
45. Falqueto A. Especificidade Alimentar de Flebotomíneos em Duas Áreas Endêmicas de Leishmaniose Tegumentar no Estado do Espírito Santo. PhD Thesis, Fundação Oswaldo Cruz. 1995. 84 p.
46. Mayo RC, Casanova C, Mascarini LM, Pignatti MG, Rangel O, Galati EAB et al. Flebotomíneos (Diptera, Psychodidae) de área de transmissão de leishmaniose tegumentar americana no município de Itaupeva, região sudeste do estado de São Paulo, Brasil. Rev Soc Bras Med Trop. 1998; 31: 339–345.
47. Souza NA, Andrade-Coelho CA, Vilela ML, Peixoto AA, Rangel EF. Seasonality of *Lutzomyia intermedia* and *Lutzomyia whitmani* (Diptera: Psychodidae: Phlebotominae), occurring sympatrically in area of cutaneous Leishmaniasis in the state of Rio de Janeiro, Brazil. Mem Inst Oswaldo Cruz. 2002; 97: 759–765. PMID: [12386692](https://pubmed.ncbi.nlm.nih.gov/12386692/)

48. Dantas-Torres F, Andrade AJ, Tenório KER, Andrade Filho JD, Balbino VQ, Brandão-Filho SP. Phlebotomine sand flies (Diptera: Psychodidae: Phlebotominae) in the State of Pernambuco. *Rev Soc Bras Med Trop.* 2010; 43:733–736. PMID: [21181035](#)
49. Costa SM, Cechinel M, Bandeira V, Zannuncio JC, Lainson R, Rangel EF. *Lutzomyia (Nyssomyia) whitmani*s.l. (Antunes & Coutinho, 1939) (Diptera: Psychodidae: Phlebotominae): geographical distribution and the epidemiology of American cutaneous leishmaniasis in Brazil. Mini-review. *Mem Inst Oswaldo Cruz.* 2007; 102: 149–153. PMID: [17426877](#)
50. Loiola CF, Silva DA, Galati EAB. Phlebotomine fauna (Diptera: Psychodidae) and species abundance in an endemic area of American cutaneous leishmaniasis in southeastern Minas Gerais, Brazil. *Mem Inst Oswaldo Cruz.* 2007; 102: 581–585. PMID: [17710302](#)
51. Rocha LS, Falqueto A, Santos CB, Grimaldi G Jr, Cupolillo E. Genetic structure of *Lutzomyia (Nyssomyia) intermedia* populations From Two Ecologic Regions In Brazil where transmission of *Leishmania (Viannia) braziliensis* reflects distinct eco-epidemiologic features. *Am. J. Trop. Med. Hyg.* 2007; 76: 559–565. PMID: [17360884](#)
52. Galati EAB, Nunes VL, Dorval MEC, Oshiro ET, Cristaldo G, Espíndola MA et al. Estudo dos flebotomíneos (Diptera, Psychodidae) em área de leishmaniose tegumentar, no Estado de Mato Grosso do Sul, Brasil. *Rev Saúde Pub.* 1996; 30: 115–128.
53. Martins F, Silva IG, Bezerra WA, Maciel JM, Silva HHG, Lima CG et al. Diversidade e frequência da fauna flebotomínea (Diptera: Psychodidae) em áreas com transmissão de leishmaniose no Estado de Goiás. *Rev Patol Trop.* 2002; 31: 211–224.
54. Oliveira AG, Andrade Filho JD, Falcão AL, Brazil RP. Estudo dos flebotomíneos (Diptera, Psychodidae, Phlebotominae) na zona urbana da cidade de Campo Grande, Mato Grosso do Sul, Brasil, 1999–2000. 2003. *Cad Saude Pub.* 2003; 19: 933–944.
55. Dorval MEMC, Cristaldo G, Rocha HC, Alves TP, Alves MA, Oshiro ET et al. Phlebotomine fauna (Diptera: Psychodidae) of an American cutaneous leishmaniasis endemic area in the state of Mato Grosso do Sul, Brazil. *Mem Inst Oswaldo Cruz.* 2009; 104: 695–702. PMID: [19820827](#)
56. Brandão-Filho SP, Brito MEF, Martins CAP, Sommer IB, Valença HF, Almeida FA et al. Leishmaniose tegumentar americana em centro de treinamento militar localizado na Zona da Mata de Pernambuco, Brasil. *Rev Soc Bras Med Trop.* 1998; 31: 575–578.
57. Cupolillo E, Brahim LR, Toaldo CB, Oliveira-Neto MP, Brito MEF, Falqueto A et al. Genetic Polymorphism and Molecular Epidemiology of *Leishmania (Viannia) braziliensis* from Different Hosts and Geographic Areas in Brazil. *J Clin Microbiol.* 2003; 41: 3126–3132. doi: [10.1128/JCM.41.7.3126-3132.2003](#) PMID: [12843052](#)
58. Salomón OD, Quintana MG, Mastrángelo AV, Fernández MS. Leishmaniasis and Climate Change—Case Study: Argentina. *J Trop Med.* 2012; 2012: 1–11.
59. Hernandez PA, Graham CH, Master LL, Albert DL. The effect of sample size and species characteristics on performance of different species distribution modeling methods. *Ecography.* 2006; 29: 773–785.
